# Supplementary material for: Ultra-short-term power load forecasting method based on stochastic configuration networks and empirical mode decomposition
Source: Frontiers journal article supplement (doi:10.3389/fenrg.2023.1182287), 2023-07-31
Supplement: Table_1.DOCX [file Table_1.DOCX]

Appendix A Number of the hidden layer nodes of SCNs and corresponding error

| Number of hidden layer nodes | RMSE% | Number of hidden layer nodes | RMSE% | Number of hidden layer nodes | RMSE% | Number of hidden layer nodes | RMSE% |
| --- | --- | --- | --- | --- | --- | --- | --- |
| 1 | 3.8283 | 76 | 0.6389 | 151 | 0.4517 | 226 | 0.2808 |
| 2 | 3.8241 | 77 | 0.6373 | 152 | 0.4492 | 227 | 0.2783 |
| 3 | 3.8222 | 78 | 0.6355 | 153 | 0.4466 | 228 | 0.2749 |
| 4 | 3.8206 | 79 | 0.6332 | 154 | 0.4452 | 229 | 0.2712 |
| 5 | 3.8184 | 80 | 0.6312 | 155 | 0.4433 | 230 | 0.2686 |
| 6 | 3.8165 | 81 | 0.6293 | 156 | 0.4416 | 231 | 0.2661 |
| 7 | 3.8132 | 82 | 0.6262 | 157 | 0.4379 | 232 | 0.2645 |
| 8 | 3.8098 | 83 | 0.6257 | 158 | 0.4366 | 233 | 0.2632 |
| 9 | 3.8051 | 84 | 0.6245 | 159 | 0.4338 | 234 | 0.2621 |
| 10 | 3.8002 | 85 | 0.6224 | 160 | 0.4301 | 235 | 0.2612 |
| 11 | 3.7938 | 86 | 0.6199 | 161 | 0.4282 | 236 | 0.2601 |
| 12 | 3.7856 | 87 | 0.6177 | 162 | 0.4265 | 237 | 0.2591 |
| 13 | 1.4386 | 88 | 0.6162 | 163 | 0.4243 | 238 | 0.2572 |
| 14 | 1.425 | 89 | 0.614 | 164 | 0.4207 | 239 | 0.2541 |
| 15 | 1.4095 | 90 | 0.6127 | 165 | 0.4187 | 240 | 0.252 |
| 16 | 1.3645 | 91 | 0.6102 | 166 | 0.4144 | 241 | 0.2512 |
| 17 | 1.3471 | 92 | 0.6089 | 167 | 0.4089 | 242 | 0.2488 |
| 18 | 1.3271 | 93 | 0.6055 | 168 | 0.4063 | 243 | 0.2451 |
| 19 | 1.2933 | 94 | 0.6034 | 169 | 0.4051 | 244 | 0.2428 |
| 20 | 1.2692 | 95 | 0.6014 | 170 | 0.403 | 245 | 0.2401 |
| 21 | 1.2406 | 96 | 0.6008 | 171 | 0.401 | 246 | 0.2391 |
| 22 | 1.2328 | 97 | 0.5986 | 172 | 0.3981 | 247 | 0.2375 |
| 23 | 1.2028 | 98 | 0.5971 | 173 | 0.3969 | 248 | 0.2346 |
| 24 | 1.1532 | 99 | 0.5954 | 174 | 0.3936 | 249 | 0.2327 |
| 25 | 1.1445 | 100 | 0.5921 | 175 | 0.3922 | 250 | 0.2305 |
| 26 | 1.1331 | 101 | 0.5885 | 176 | 0.3907 | 251 | 0.2287 |
| 27 | 1.0875 | 102 | 0.5876 | 177 | 0.3885 | 252 | 0.2269 |
| 28 | 1.0783 | 103 | 0.5856 | 178 | 0.3872 | 253 | 0.2244 |
| 29 | 1.0722 | 104 | 0.5831 | 179 | 0.3836 | 254 | 0.2215 |
| 30 | 1.059 | 105 | 0.5796 | 180 | 0.382 | 255 | 0.2203 |
| 31 | 1.0405 | 106 | 0.5755 | 181 | 0.38 | 256 | 0.2198 |
| 32 | 1.0117 | 107 | 0.5731 | 182 | 0.3783 | 257 | 0.2188 |
| 33 | 1.0032 | 108 | 0.5708 | 183 | 0.3751 | 258 | 0.2176 |
| 34 | 0.9936 | 109 | 0.5686 | 184 | 0.3712 | 259 | 0.2165 |
| 35 | 0.9545 | 110 | 0.5613 | 185 | 0.3701 | 260 | 0.2159 |
| 36 | 0.9301 | 111 | 0.56 | 186 | 0.3689 | 261 | 0.2155 |
| 37 | 0.917 | 112 | 0.558 | 187 | 0.3682 | 262 | 0.2155 |
| 38 | 0.9102 | 113 | 0.5542 | 188 | 0.3649 | 263 | 0.2155 |
| 39 | 0.901 | 114 | 0.5529 | 189 | 0.3637 | 264 | 0.2155 |
| 40 | 0.8951 | 115 | 0.5508 | 190 | 0.3614 | 265 | 0.2155 |
| 41 | 0.8758 | 116 | 0.5491 | 191 | 0.3597 | 266 | 0.2155 |
| 42 | 0.8704 | 117 | 0.5477 | 192 | 0.3563 | 267 | 0.2155 |
| 43 | 0.8535 | 118 | 0.5461 | 193 | 0.3563 | 268 | 0.2155 |
| 44 | 0.848 | 119 | 0.5421 | 194 | 0.3539 | 269 | 0.2155 |
| 45 | 0.8446 | 120 | 0.5411 | 195 | 0.351 | 270 | 0.2155 |
| 46 | 0.8277 | 121 | 0.5394 | 196 | 0.3479 | 271 | 0.2155 |
| 47 | 0.8223 | 122 | 0.5374 | 197 | 0.3457 | 272 | 0.2155 |
| 48 | 0.8074 | 123 | 0.5339 | 198 | 0.3415 | 273 | 0.2155 |
| 49 | 0.7983 | 124 | 0.5312 | 199 | 0.3371 | 274 | 0.2155 |
| 50 | 0.7749 | 125 | 0.5289 | 200 | 0.3356 | 275 | 0.2155 |
| 51 | 0.7749 | 126 | 0.5242 | 201 | 0.3339 | 276 | 0.2155 |
| 52 | 0.77 | 127 | 0.5196 | 202 | 0.3315 | 277 | 0.2155 |
| 53 | 0.7592 | 128 | 0.5185 | 203 | 0.3305 | 278 | 0.2155 |
| 54 | 0.7504 | 129 | 0.5163 | 204 | 0.3289 | 279 | 0.2155 |
| 55 | 0.7438 | 130 | 0.5144 | 205 | 0.3287 | 280 | 0.2155 |
| 56 | 0.7301 | 131 | 0.5124 | 206 | 0.3276 | 281 | 0.2155 |
| 57 | 0.724 | 132 | 0.5098 | 207 | 0.3252 | 282 | 0.2155 |
| 58 | 0.7165 | 133 | 0.5075 | 208 | 0.322 | 283 | 0.2155 |
| 59 | 0.7118 | 134 | 0.5045 | 209 | 0.3207 | 284 | 0.2155 |
| 60 | 0.7102 | 135 | 0.503 | 210 | 0.3165 | 285 | 0.2155 |
| 61 | 0.7072 | 136 | 0.4996 | 211 | 0.3144 | 286 | 0.2155 |
| 62 | 0.7056 | 137 | 0.4958 | 212 | 0.3119 | 287 | 0.2155 |
| 63 | 0.7016 | 138 | 0.4933 | 213 | 0.3089 | 288 | 0.2155 |
| 64 | 0.7 | 139 | 0.4923 | 214 | 0.307 | 289 | 0.2155 |
| 65 | 0.6951 | 140 | 0.4879 | 215 | 0.3048 | 290 | 0.2155 |
| 66 | 0.6846 | 141 | 0.483 | 216 | 0.3021 | 291 | 0.2155 |
| 67 | 0.6779 | 142 | 0.4801 | 217 | 0.2998 | 292 | 0.2155 |
| 68 | 0.6749 | 143 | 0.4771 | 218 | 0.298 | 293 | 0.2155 |
| 69 | 0.6705 | 144 | 0.4758 | 219 | 0.2967 | 294 | 0.2155 |
| 70 | 0.6651 | 145 | 0.4717 | 220 | 0.2954 | 295 | 0.2155 |
| 71 | 0.6631 | 146 | 0.4697 | 221 | 0.2904 | 296 | 0.2155 |
| 72 | 0.658 | 147 | 0.4639 | 222 | 0.2878 | 297 | 0.2155 |
| 73 | 0.6507 | 148 | 0.4611 | 223 | 0.2855 | 298 | 0.2155 |
| 74 | 0.6452 | 149 | 0.4601 | 224 | 0.2841 | 299 | 0.2155 |
| 75 | 0.6413 | 150 | 0.4578 | 225 | 0.2829 | 300 | 0.2155 |
